# Supplementary material for: Career specialty choices of UK medical graduates of 2015 compared with earlier cohorts: questionnaire surveys
Source: PubMed Central journal article supplement — Postgrad Med J. 2018 Feb 12;94(1110):191–7. doi: 10.1136/postgradmedj-2017-135309 (PMC5870466; doi:10.1136/postgradmedj-2017-135309), 2018-02-12
Supplement: postgradmedj-2017-135309supp001.pdf [file postgradmedj-2017-135309supp001.pdf]

Appendix 1: Percentages by gender of doctors who gave each specialty as their first choice of long term career: UK medical graduates of 2015, 2012, 2009, 2008 and 2005 surveyed 1 year after graduation: detailed specialty breakdown

| Grouped/individual specialty        | Graduation year(s)  |                    |                 |                    |                  |                    |
|-------------------------------------|---------------------|--------------------|-----------------|--------------------|------------------|--------------------|
|                                     | 2005, 2008 and 2009 |                    | 2012            |                    | 2015             |                    |
|                                     | Male<br>(n=3031)    | Female<br>(n=5506) | Male<br>(n=859) | Female<br>(n=1454) | Male<br>(n=1206) | Female<br>(n=1834) |
| <b>General practice</b>             | <b>22.4</b>         | <b>36.1</b>        | <b>24.0</b>     | <b>33.6</b>        | <b>19.3</b>      | <b>33.3</b>        |
| <b>Hospital medical specialties</b> | <b>26.7</b>         | <b>26.4</b>        | <b>27.5</b>     | <b>26.8</b>        | <b>24.4</b>      | <b>27.9</b>        |
| Academic medicine                   | 0.5                 | 0.1                | 0.2             | 0.1                | 0.1              | 0.2                |
| Cardiology                          | 5.4                 | 2.2                | 5.4             | 2.1                | 3.8              | 1.4                |
| Chest medicine                      | 2.5                 | 2.1                | 2.4             | 1.7                | 1.5              | 1.9                |
| Clinical pharmacology               | 0.1                 | 0.1                | 0.1             | 0.0                | 0.1              | 0.0                |
| Dermatology                         | 0.8                 | 1.8                | 0.8             | 2.5                | 1.1              | 2.5                |
| Endocrinology                       | 0.9                 | 0.9                | 1.0             | 0.4                | 0.7              | 0.8                |
| Gastroenterology                    | 2.6                 | 1.9                | 2.1             | 2.3                | 1.8              | 1.9                |
| General medicine                    | 7.9                 | 9.2                | 6.2             | 7.7                | 6.3              | 9.9                |
| Genito-urinary medicine             | 0.3                 | 0.7                | 0.8             | 1.2                | 0.4              | 1.1                |
| Geriatrics                          | 0.7                 | 2.0                | 1.7             | 4.0                | 2.0              | 3.8                |
| Infectious diseases                 | 1.5                 | 1.2                | 1.3             | 1.2                | 1.2              | 1.3                |
| Nephrology                          | 1.2                 | 0.7                | 1.6             | 0.8                | 1.4              | 0.9                |
| Neurology                           | 2.4                 | 1.2                | 2.3             | 0.6                | 1.8              | 0.8                |
| Occupational medicine               | 0.0                 | 0.0                | 0.1             | 0.1                | 0.2              | 0.0                |
| Rheumatology/Rehabilitation         | 0.8                 | 0.9                | 1.0             | 1.4                | 0.9              | 1.2                |
| Tropical medicine                   | 0.3                 | 0.3                | 0.6             | 0.1                | 0.2              | 0.2                |
| <b>Surgery</b>                      | <b>29.5</b>         | <b>12.3</b>        | <b>23.4</b>     | <b>10.8</b>        | <b>21.7</b>      | <b>12.5</b>        |
| Academic surgery                    | 0.1                 | 0.0                | 0.0             | 0.0                | 0.0              | 0.0                |
| Cardiac surgery                     | 0.6                 | 0.0                | 0.6             | 0.2                | 0.9              | 0.4                |
| Ear nose and throat                 | 2.0                 | 1.0                | 2.2             | 1.1                | 2.2              | 1.1                |
| General surgery                     | 8.8                 | 4.5                | 4.1             | 2.8                | 6.4              | 4.9                |
| Neurosurgery                        | 2.2                 | 0.3                | 1.7             | 0.4                | 1.2              | 0.4                |
| Ophthalmology                       | 2.3                 | 1.3                | 2.2             | 1.3                | 3.0              | 1.9                |
| Oral & Maxillofacial Surgery        | 1.1                 | 0.2                | 0.9             | 0.3                | 0.9              | 0.3                |
| Trauma & orthopaedic surgery        | 8.1                 | 1.4                | 6.4             | 1.4                | 5.7              | 1.4                |
| Paediatric surgery                  | 0.7                 | 0.6                | 1.2             | 0.4                | 0.6              | 0.4                |
| Plastic surgery                     | 2.9                 | 1.3                | 2.3             | 1.4                | 1.2              | 1.1                |
| Urology                             | 1.2                 | 0.5                | 1.4             | 0.5                | 1.0              | 0.5                |
| Vascular surgery                    | 0.7                 | 0.3                | 0.3             | 0.3                | 0.3              | 0.3                |
| <b>Anaesthesia</b>                  | <b>15.1</b>         | <b>11.0</b>        | <b>14.8</b>     | <b>12.0</b>        | <b>20.8</b>      | <b>12.5</b>        |
| Anaesthesia                         | 10.3                | 7.9                | 10.6            | 8.3                | 14.7             | 10.4               |
| Intensive care/anaesthesia          | 5.4                 | 3.4                | 5.7             | 4.5                | 7.9              | 2.8                |
| <b>Paediatrics</b>                  | <b>4.6</b>          | <b>11.7</b>        | <b>5.5</b>      | <b>11.6</b>        | <b>6.8</b>       | <b>9.8</b>         |
| <b>Emergency medicine</b>           | <b>6.2</b>          | <b>4.0</b>         | <b>5.6</b>      | <b>3.9</b>         | <b>6.6</b>       | <b>5.0</b>         |
| <b>Psychiatry</b>                   | <b>3.9</b>          | <b>3.9</b>         | <b>4.7</b>      | <b>3.8</b>         | <b>5.5</b>       | <b>5.4</b>         |
| Child/adolescent psychiatry         | 0.2                 | 0.5                | 0.1             | 0.2                | 0.0              | 0.2                |
| Forensic psychiatry                 | 0.3                 | 0.2                | 0.3             | 0.2                | 0.0              | 0.1                |
| General psychiatry                  | 3.4                 | 3.1                | 4.2             | 3.3                | 5.4              | 5.2                |
| Learning disabilities               | 0.1                 | 0.0                | 0.0             | 0.0                | 0.0              | 0.0                |
| Psychogeriatrics                    | 0.0                 | 0.2                | 0.0             | 0.0                | 0.0              | 0.0                |
| Psychotherapy                       | 0.0                 | 0.1                | 0.1             | 0.1                | 0.0              | 0.0                |
| <b>Obstetrics and gynaecology</b>   | <b>2.2</b>          | <b>7.9</b>         | <b>2.4</b>      | <b>7.3</b>         | <b>2.2</b>       | <b>7.5</b>         |
| <b>Pathology</b>                    | <b>2.4</b>          | <b>2.8</b>         | <b>1.9</b>      | <b>3.5</b>         | <b>3.5</b>       | <b>3.0</b>         |
| Forensic medicine                   | 0.0                 | 0.3                | 0.0             | 0.0                | 0.1              | 0.2                |
| General pathology                   | 0.3                 | 0.2                | 0.2             | 0.1                | 0.3              | 0.2                |
| Genetics                            | 0.2                 | 0.3                | 0.0             | 0.7                | 0.5              | 0.2                |
| Haematology                         | 1.1                 | 1.2                | 1.0             | 1.8                | 1.5              | 1.5                |
| Histopathology                      | 0.3                 | 0.3                | 0.1             | 0.4                | 0.4              | 0.4                |
| Immunology                          | 0.1                 | 0.1                | 0.2             | 0.1                | 0.2              | 0.3                |
| Microbiology                        | 0.5                 | 0.4                | 0.2             | 0.4                | 0.7              | 0.2                |
| <b>Radiology</b>                    | <b>2.9</b>          | <b>1.7</b>         | <b>3.8</b>      | <b>1.7</b>         | <b>4.4</b>       | <b>2.1</b>         |
| <b>Radiotherapy and oncology</b>    | <b>1.5</b>          | <b>2.5</b>         | <b>2.3</b>      | <b>2.6</b>         | <b>3.0</b>       | <b>2.3</b>         |
| <b>Public health</b>                | <b>1.1</b>          | <b>0.9</b>         | <b>1.0</b>      | <b>1.4</b>         | <b>0.7</b>       | <b>1.0</b>         |

|                                  |            |            |            |            |            |            |
|----------------------------------|------------|------------|------------|------------|------------|------------|
| <b>Community health</b>          | <b>0.0</b> | <b>0.2</b> | <b>0.1</b> | <b>0.3</b> | <b>0.1</b> | <b>0.4</b> |
| Family planning                  | 0.0        | 0.1        | 0.1        | 0.3        | 0.1        | 0.4        |
| General Community health         | 0.0        | 0.0        | 0.0        | 0.0        | 0.0        | 0.1        |
| <b>Other medical specialties</b> | <b>0.8</b> | <b>0.9</b> | <b>0.8</b> | <b>0.4</b> | <b>0.6</b> | <b>0.8</b> |
| <b>Not stated</b>                | <b>0.2</b> | <b>0.2</b> | <b>3.3</b> | <b>4.1</b> | <b>2.6</b> | <b>4.0</b> |
| <b>Non-medical</b>               | <b>1.0</b> | <b>0.7</b> | <b>0.9</b> | <b>0.6</b> | <b>1.9</b> | <b>1.1</b> |

Note: The grouped specialty percentages in bold may be lower than the total of each individual specialty belonging to that group: if a respondent gave 'Anaesthetics' as their tied first choice with 'Intensive care/anaesthesia', this would only result in one count at the grouped specialty level.
