# Supplementary material for: Career specialty choices of UK medical graduates of 2015 compared with earlier cohorts: questionnaire surveys
Source: PubMed Central journal article supplement — Postgrad Med J. 2018 Feb 12;94(1110):191–7. doi: 10.1136/postgradmedj-2017-135309 (PMC5870466; doi:10.1136/postgradmedj-2017-135309), 2018-02-12
Supplement: postgradmedj-2017-135309supp002.pdf [file postgradmedj-2017-135309supp002.pdf]

Appendix 2: Clinical medical school attended and first choice of long-term career (percentages): UK medical graduates of 2015, surveyed in 2016

| Clinical medical school attended |          | Hospital medical specialties | Paediatrics    | Emergency medicine | Obstetrics & gynaecology | Anaesthesia    |
|----------------------------------|----------|------------------------------|----------------|--------------------|--------------------------|----------------|
| <b>Men</b>                       |          | <b>p=0.766</b>               | <b>p=0.973</b> | <b>p=0.764</b>     | <b>n/a</b>               | <b>p=0.153</b> |
| Oxbridge                         | (n=95)   | 20.0                         | 8.4            | 9.5                | 3.2                      | 24.2           |
| London                           | (n=304)  | 26.0                         | 6.6            | 6.3                | 1.6                      | 17.1           |
| Rest of England                  | (n=606)  | 25.1                         | 6.8            | 5.9                | 2.1                      | 22.9           |
| Scotland                         | (n=121)  | 22.3                         | 5.8            | 8.3                | 3.3                      | 21.5           |
| Wales                            | (n=47)   | 23.4                         | 8.5            | 8.5                | 0.0                      | 17.0           |
| Northern Ireland                 | (n=33)   | 18.2                         | 6.1            | 6.1                | 3.0                      | 9.1            |
| Total                            | (n=1206) | 24.4                         | 6.8            | 6.6                | 2.2                      | 20.8           |
| <b>Women</b>                     |          | <b>p=0.223</b>               | <b>p=0.440</b> | <b>p=0.271</b>     | <b>p=0.236</b>           | <b>p=0.060</b> |
| Oxbridge                         | (n=92)   | 34.8                         | 14.1           | 3.3                | 4.3                      | 15.2           |
| London                           | (n=370)  | 27.6                         | 9.2            | 3.0                | 8.6                      | 8.6            |
| Rest of England                  | (n=984)  | 26.6                         | 10.3           | 5.2                | 8.3                      | 12.8           |
| Scotland                         | (n=229)  | 30.6                         | 7.4            | 6.6                | 6.1                      | 12.2           |
| Wales                            | (n=107)  | 32.7                         | 10.3           | 6.5                | 3.7                      | 17.8           |
| Northern Ireland                 | (n=52)   | 19.2                         | 5.8            | 7.7                | 3.8                      | 19.2           |
| Total                            | (n=1834) | 27.9                         | 9.8            | 5.0                | 7.5                      | 12.5           |
| <b>All</b>                       |          | <b>p=0.548</b>               | <b>p=0.470</b> | <b>p=0.472</b>     | <b>p=0.411</b>           | <b>p=0.102</b> |
| Oxbridge                         | (n=187)  | 27.3                         | 11.2           | 6.4                | 3.7                      | 19.8           |
| London                           | (n=674)  | 26.9                         | 8.0            | 4.5                | 5.5                      | 12.5           |
| Rest of England                  | (n=1590) | 26.0                         | 8.9            | 5.5                | 6.0                      | 16.7           |
| Scotland                         | (n=350)  | 27.7                         | 6.9            | 7.1                | 5.1                      | 15.4           |
| Wales                            | (n=154)  | 29.9                         | 9.7            | 7.1                | 2.6                      | 17.5           |
| Northern Ireland                 | (n=85)   | 18.8                         | 5.9            | 7.1                | 3.5                      | 15.3           |
| Total                            | (n=3040) | 26.5                         | 8.6            | 5.6                | 5.4                      | 15.8           |

| Clinical medical school attended |          | Radiology      | Radiotherapy & oncology | Pathology      | Psychiatry     |
|----------------------------------|----------|----------------|-------------------------|----------------|----------------|
| <b>Men</b>                       |          | <b>p=0.884</b> | <b>n/a</b>              | <b>p=0.058</b> | <b>p=0.193</b> |
| Oxbridge                         | (n=95)   | 4.2            | 6.3                     | 6.3            | 5.3            |
| London                           | (n=304)  | 3.3            | 3.6                     | 3.0            | 5.9            |
| Rest of England                  | (n=606)  | 4.6            | 2.6                     | 3.1            | 4.6            |
| Scotland                         | (n=121)  | 5.8            | 2.5                     | 2.5            | 6.6            |
| Wales                            | (n=47)   | 4.3            | 0.0                     | 2.1            | 4.3            |
| Northern Ireland                 | (n=33)   | 6.1            | 0.0                     | 12.1           | 15.2           |
| Total                            | (n=1206) | 4.4            | 3.0                     | 3.5            | 5.5            |
| <b>Women</b>                     |          | <b>n/a</b>     | <b>n/a</b>              | <b>p=0.976</b> | <b>p=0.046</b> |
| Oxbridge                         | (n=92)   | 4.3            | 3.3                     | 2.2            | 7.6            |
| London                           | (n=370)  | 3.5            | 2.7                     | 2.7            | 8.1            |
| Rest of England                  | (n=984)  | 1.2            | 1.8                     | 3.2            | 4.9            |
| Scotland                         | (n=229)  | 3.1            | 3.5                     | 3.5            | 2.6            |
| Wales                            | (n=107)  | 1.9            | .9                      | 2.8            | 3.7            |
| Northern Ireland                 | (n=52)   | 1.9            | 3.8                     | 1.9            | 7.7            |
| Total                            | (n=1834) | 2.1            | 2.3                     | 3.0            | 5.4            |
| <b>All</b>                       |          | <b>p=0.542</b> | <b>p=0.131</b>          | <b>p=0.669</b> | <b>p=0.036</b> |
| Oxbridge                         | (n=187)  | 4.3            | 4.8                     | 4.3            | 6.4            |
| London                           | (n=674)  | 3.4            | 3.1                     | 2.8            | 7.1            |
| Rest of England                  | (n=1590) | 2.5            | 2.1                     | 3.1            | 4.8            |
| Scotland                         | (n=350)  | 4.0            | 3.1                     | 3.1            | 4.0            |
| Wales                            | (n=154)  | 2.6            | .6                      | 2.6            | 3.9            |
| Northern Ireland                 | (n=85)   | 3.5            | 2.4                     | 5.9            | 10.6           |
| Total                            | (n=3040) | 3.0            | 2.6                     | 3.2            | 5.4            |

Note: The percentages given are for tied and untied first choices; Excludes 105 'not stated' responses.  
 Note: 'n/a' denotes cells for which chi-square could not be calculated due to low counts.
